# Supplementary material for: An Improved Artificial Colony Algorithm Model for Forecasting Chinese Electricity Consumption and Analyzing Effect Mechanism
Source: Hindawi journal article supplement (doi:10.1155/2016/8496971), 2016-01-01
Supplement: f1 [file 8496971.f1.pdf]

The tables in this supplementary material paper are data all used in the empirical analysis of the proposed improved ABC algorithm application, but not included in the formal paper "An Improved Artificial Colony Algorithm Model for Forecasting Chinese Electricity Consumption and Analyzing Effect Mechanism". Especially, the running results based on the improved ABC algorithm are attached to the excel form named "running results".

Table 1. Basic data

| Year | RGDP(Billion RMB) | FAI(100Million RMB) | FDI(10 Thousand Dollars) | POP(10 Thousand ) | Urbanization level(%) | Household consumption level(RMB) | Real GDP of secondary industry(Billion RMB) | Carbon emission (Million Ton) | Electricity consumption (100Millionkw.h) |
|------|-------------------|---------------------|--------------------------|-------------------|-----------------------|----------------------------------|---------------------------------------------|-------------------------------|------------------------------------------|
| 1990 | 1877.43           | 4517                | 1028900                  | 114333            | 26.41%                | 831                              | 743.46228                                   | 2457.765121                   | 6230.4                                   |
| 1991 | 2049.76           | 5109.13242          | 1155000                  | 115823            | 26.94%                | 854.268                          | 1252.40336                                  | 2590.969234                   | 6804                                     |
| 1992 | 2342.87           | 7007.892454         | 1920200                  | 117171            | 27.46%                | 927.735048                       | 1480.69384                                  | 2722.926247                   | 7589.2                                   |
| 1993 | 2668.53           | 10325.67141         | 3895500                  | 118517            | 27.99%                | 1051.123809                      | 1718.53332                                  | 2876.538225                   | 8426.5                                   |
| 1994 | 3017.6            | 15436.68478         | 4320600                  | 119850            | 28.51%                | 1139.418209                      | 2000.6688                                   | 3029.011891                   | 9260.37                                  |
| 1995 | 3349.53           | 18903.96601         | 4813300                  | 121121            | 29.04%                | 1191.831447                      | 2103.50484                                  | 3228.356161                   | 10023.4                                  |
| 1996 | 3681.13           | 22032.21154         | 5480400                  | 122389            | 30.48%                | 1290.753457                      | 2289.66286                                  | 3322.882025                   | 10764.29                                 |
| 1997 | 4019.8            | 24524.18879         | 6440800                  | 123626            | 31.91%                | 1412.084282                      | 2371.682                                    | 3313.757854                   | 11284.4                                  |
| 1998 | 4334.68           | 28463.12625         | 5855700                  | 124761            | 33.35%                | 1475.628075                      | 2587.80396                                  | 3312.470944                   | 11598.43                                 |
| 1999 | 4664.98           | 29974.59839         | 5265900                  | 125786            | 34.78%                | 1562.690131                      | 2649.70864                                  | 3422.665765                   | 12305.23                                 |

|      |          |             |          |        |        |             |            |             |          |
|------|----------|-------------|----------|--------|--------|-------------|------------|-------------|----------|
| 2000 | 5058.3   | 32559.57468 | 5936000  | 126743 | 36.22% | 1692.393412 | 3009.6885  | 3513.687823 | 13471.38 |
| 2001 | 5478.15  | 37065.22908 | 4967000  | 127627 | 37.66% | 1871.787114 | 2530.9053  | 3673.540716 | 14633.46 |
| 2002 | 5975.68  | 43413.08383 | 5501000  | 128453 | 39.09% | 1985.966128 | 2940.03456 | 4024.633705 | 16465.45 |
| 2003 | 6574.77  | 54370.45988 | 5614000  | 129227 | 40.53% | 2152.787282 | 3806.79183 | 4722.877766 | 19031.6  |
| 2004 | 7237.83  | 66739.96212 | 6407200  | 129988 | 41.76% | 2277.648945 | 3741.95811 | 5521.14595  | 21971.37 |
| 2005 | 8056.44  | 87375.61024 | 6380500  | 130756 | 42.99% | 2441.639669 | 4052.38932 | 6326.064225 | 24940.39 |
| 2006 | 9077.71  | 108372.6108 | 6708000  | 131448 | 44.34% | 2678.478717 | 4493.46645 | 6925.899506 | 28587.97 |
| 2007 | 10363.33 | 132169.3359 | 7834000  | 132129 | 45.89% | 2903.470929 | 5171.30167 | 7517.956726 | 32711.79 |
| 2008 | 11361.81 | 158703.7649 | 9525300  | 132802 | 46.99% | 3275.115208 | 5499.11604 | 7662.85413  | 34380    |
| 2009 | 12407.09 | 230121.6906 | 9180400  | 133450 | 48.34% | 3546.94977  | 6439.27971 | 8036.935367 | 36430    |
| 2010 | 13722.24 | 242938.0019 | 10882000 | 134091 | 49.95% | 3894.550847 | 7849.12128 | 8471.926924 | 41923    |
| 2011 | 15025.86 | 292199.9343 | 11769800 | 134735 | 51.27% | 4268.427729 | 7738.3179  | 9206.120993 | 46928    |
| 2012 | 16189.99 | 370617.9426 | 11329400 | 135404 | 52.57% | 4737.954779 | 7981.66507 | 9415.422465 | 49762.64 |
| 2013 | 17434.25 | 444959.2124 | 11872100 | 136072 | 53.73% | 5169.108664 | 8368.44    | 9674.220559 | 53223    |
| 2014 | 18706.95 | 510209.6517 | 11970500 | 136782 | 54.77% | 5546.453596 | 8810.97345 | 9761.077863 | 55233    |

Table 2. Regression analysis between electricity consumption and real GDP

| Regression statistics  |          |
|------------------------|----------|
| Multiple R             | 0.996564 |
| R Square               | 0.993139 |
| Adjusted R Square      | 0.992841 |
| Standard error         | 1353.061 |
| Number of observations | 25       |

Table 3. Analysis of variance between electricity consumption and real GDP of secondary industry

|                     | Analysis of variance |             |             |          |                |
|---------------------|----------------------|-------------|-------------|----------|----------------|
|                     | df                   | SS          | MS          | F        | Significance F |
| Regression analysis | 1                    | 6095330935  | 6095330935  | 3329.372 | 2.17E-26       |
| residual            | 23                   | 42107829.04 | 1830775.175 |          |                |
| Total value         | 24                   | 6137438764  |             |          |                |

Table 4. Regression analysis between electricity consumption and FAI

| Regression statistics |          |
|-----------------------|----------|
| Multiple R            | 0.960324 |
| R Square              | 0.922222 |
| Adjusted R Square     | 0.91884  |
| Standard error        | 4555.742 |

Number of observations 25

Table 5. Analysis of variance between electricity consumption and FAI

| Analysis of variance |    |             |             |         |                |
|----------------------|----|-------------|-------------|---------|----------------|
|                      | df | SS          | MS          | F       | Significance F |
| Regression analysis  | 1  | 5660078747  | 5660078747  | 272.712 | 3E-14          |
| residual             | 23 | 477360017.8 | 20754783.38 |         |                |
| Total value          | 24 | 6137438764  |             |         |                |

Table 6. Regression analysis between electricity consumption and FDI

| Regression statistics  |          |
|------------------------|----------|
| Multiple R             | 0.940741 |
| R Square               | 0.884993 |
| Adjusted R Square      | 0.879993 |
| Standard error         | 5539.773 |
| Number of observations | 25       |

Table 7. Analysis of variance between electricity consumption and FDI

| Analysis of variance |    |             |             |             |                |
|----------------------|----|-------------|-------------|-------------|----------------|
|                      | df | SS          | MS          | F           | Significance F |
| Regression analysis  | 1  | 5431589697  | 5431589697  | 176.9876434 | 2.75E-12       |
| residual             | 23 | 705849067.4 | 30689089.89 |             |                |
| Total value          | 24 | 6137438764  |             |             |                |

Table 8. Regression analysis between electricity consumption and POP

| Regression statistics  |          |
|------------------------|----------|
| Multiple R             | 0.897789 |
| R Square               | 0.806026 |
| Adjusted R Square      | 0.797592 |
| Standard error         | 7194.517 |
| Number of observations | 25       |

Table 9. Analysis of variance between electricity consumption and POP

|                     | Analysis of variance |            |             |           |                |
|---------------------|----------------------|------------|-------------|-----------|----------------|
|                     | df                   | SS         | MS          | F         | Significance F |
| Regression analysis | 1                    | 4946934021 | 4946934021  | 95.572473 | 1.17E-09       |
| residual            | 23                   | 1190504744 | 51761075.81 |           |                |
| Total value         | 24                   | 6137438764 |             |           |                |

Table 10. Regression analysis between electricity consumption and urbanization level

| Regression statistics  |          |
|------------------------|----------|
| Multiple R             | 0.964297 |
| R Square               | 0.929869 |
| Adjusted R Square      | 0.926820 |
| Standard error         | 4325.974 |
| Number of observations | 25       |

Table 11. Analysis of variance between electricity consumption and urbanization level

|                     | Analysis of variance |             |             |             |                |
|---------------------|----------------------|-------------|-------------|-------------|----------------|
|                     | df                   | SS          | MS          | F           | Significance F |
| Regression analysis | 1                    | 5707015494  | 5707015494  | 304.9587819 | 9.0948E-15     |
| residual            | 23                   | 430423270.7 | 18714055.25 |             |                |
| Total value         | 24                   | 6137438764  |             |             |                |

Table 12. Regression analysis between electricity consumption and household consumption level

| Regression statistics  |          |
|------------------------|----------|
| Multiple R             | 0.994267 |
| R Square               | 0.988567 |
| Adjusted R Square      | 0.98807  |
| Standard error         | 1746.659 |
| Number of observations | 25       |

Table 13. Analysis of variance between electricity consumption and household consumption level

|                     | Analysis of variance |             |             |             |                |
|---------------------|----------------------|-------------|-------------|-------------|----------------|
|                     | df                   | SS          | MS          | F           | Significance F |
| Regression analysis | 1                    | 6067269922  | 6067269922  | 1988.734648 | 7.72E-24       |
| residual            | 23                   | 70168842.45 | 3050819.237 |             |                |
| Total value         | 24                   | 6137438764  |             |             |                |

Table 14. Regression analysis between electricity consumption and real GDP of secondary industry

| Regression statistics  |          |
|------------------------|----------|
| Multiple R             | 0.990537 |
| R Square               | 0.981163 |
| Adjusted R Square      | 0.980344 |
| Standard error         | 2242.015 |
| Number of observations | 25       |

Table 15. Analysis of variance between electricity consumption and real GDP of secondary industry

|                     | Analysis of variance |             |             |             |                |
|---------------------|----------------------|-------------|-------------|-------------|----------------|
|                     | df                   | SS          | MS          | F           | Significance F |
| Regression analysis | 1                    | 6021826237  | 6021826237  | 1197.984388 | 2.41E-21       |
| residual            | 23                   | 115612527.9 | 5026631.648 |             |                |
| Total value         | 24                   | 6137438764  |             |             |                |

Table 16. Regression analysis between electricity consumption and carbon emission

| Regression statistics  |          |
|------------------------|----------|
| Multiple R             | 0.989751 |
| R Square               | 0.979607 |
| Adjusted R Square      | 0.978720 |
| Standard error         | 2332.755 |
| Number of observations | 25       |

Table 17. Analysis of variance between electricity consumption and carbon emission

|                     | Analysis of variance |                  |                  |            |                |
|---------------------|----------------------|------------------|------------------|------------|----------------|
|                     | df                   | SS               | MS               | F          | Significance F |
| Regression analysis | 1                    | 6012278569.56403 | 6012278569.56403 | 1104.84334 | 6.02E-21       |
| residual            | 23                   | 125160194.83755  | 5441747.60163    |            |                |
| Total value         | 24                   | 6137438764.40158 |                  |            |                |
